# Supplementary material for: Trends in the incidence of chronic fatigue syndrome and fibromyalgia in the UK, 2001–2013: a Clinical Practice Research Datalink study
Source: PubMed Central journal article supplement (PMC5499564; doi:10.1177/0141076817702530), 2017-03-30
Supplement: JRS702530_supplementary_tables.pdf [file JRS702530_supplementary_tables.pdf]

**Supplementary Table 1: READ codes defining diagnoses and symptoms**

| <b>READ CODE</b> | <b>READ TERM</b>                                          | <b>Type of event</b> |
|------------------|-----------------------------------------------------------|----------------------|
| Eu46011          | [X]FATIGUE SYNDROME                                       | CFS/ME               |
| F03y.12          | MYALGIC ENCEPHALOMYELITIS                                 | CFS/ME               |
| F286.00          | CHRONIC FATIGUE SYNDROME                                  | CFS/ME               |
| F286.11          | CFS - CHRONIC FATIGUE SYNDROME                            | CFS/ME               |
| F286.15          | MYALGIC ENCEPHALOMYELITIS                                 | CFS/ME               |
| F286.16          | ME - MYALGIC ENCEPHALOMYELITIS                            | CFS/ME               |
| F286000          | Mild chronic fatigue syndrome                             | CFS/ME               |
| F286100          | Moderate chronic fatigue syndrome                         | CFS/ME               |
| F286200          | Severe chronic fatigue syndrome                           | CFS/ME               |
| F286.12          | POSTVIRAL FATIGUE SYNDROME                                | PVFS                 |
| F286.13          | PVFS - POSTVIRAL FATIGUE SYN                              | PVFS                 |
| F286.14          | POST-VIRAL FATIGUE SYNDROME                               | PVFS                 |
| R007400          | [D]POSTVIRAL (ASTHENIC) SYNDROME                          | PVFS                 |
| 1684.13          | C/O - POSTVIRAL SYNDROME                                  | PVFS                 |
| R007411          | [D]POST VIRAL DEBILITY                                    | PVFS                 |
| Eu46000          | [X]NEURASTHENIA                                           | Asthenia/Debility    |
| Eu46y14          | [X]PSYCHASTHENIA                                          | Asthenia/Debility    |
| Eu46y15          | [X]PSYCHASTHENIA NEUROSIS                                 | Asthenia/Debility    |
| E205.00          | NEURASTHENIA - NERVOUS DEBILITY                           | Asthenia/Debility    |
| N239.00          | FIBROMYALGIA                                              | FM                   |
| N248.00          | FIBROMYALGIA                                              | FM                   |
| 8HkW.00          | Referral to chronic fatigue syndrome specialist team      | Referral             |
| 8HIL.00          | Referral for chronic fatigue syndrome activity management | Referral             |
| 8Q1..00          | Activity management for chronic fatigue syndrome          | Referral             |
| R007200          | [D]ASTHENIA NOS                                           | Symptom              |
| R202.00          | [D]SENILE ASTHENIA                                        | Symptom              |
| R2y3.00          | [D]DEBILITY, UNSPECIFIED                                  | Symptom              |
| 168..00          | TIREDNESS SYMPTOM                                         | Symptom              |
| 168..11          | FATIGUE - SYMPTOM                                         | Symptom              |
| 168..12          | LETHARGY - SYMPTOM                                        | Symptom              |
| 168..13          | MALAISE - SYMPTOM                                         | Symptom              |
| 1682.00          | FATIGUE                                                   | Symptom              |
| 1683.00          | TIRED ALL THE TIME                                        | Symptom              |
| 1683.11          | C/O - "TIRED ALL THE TIME"                                | Symptom              |
| 1684.00          | MALAISE/LETHARGY                                          | Symptom              |
| 1684.11          | C/O - DEBILITY - MALAISE                                  | Symptom              |
| 168Z.00          | TIREDNESS SYMPTOM NOS                                     | Symptom              |
| E205.12          | TIRED ALL THE TIME                                        | Symptom              |
| R007.00          | [D]MALAISE AND FATIGUE                                    | Symptom              |
| R007000          | [D]MALAISE                                                | Symptom              |
| R007100          | [D]FATIGUE                                                | Symptom              |
| R007211          | [D]GENERAL WEAKNESS                                       | Symptom              |
| R007300          | [D]LETHARGY                                               | Symptom              |
| R007500          | [D]TIREDNESS                                              | Symptom              |
| R007z00          | [D]MALAISE AND FATIGUE NOS                                | Symptom              |

**Supplementary Table 2: Diagnostic events and rates (per 100,000), 2001-2013**

| Year | Denominator | Asthenia/Debility |                   | CFS/ME |                   | Fibromyalgia |                   | PVFS   |                   |
|------|-------------|-------------------|-------------------|--------|-------------------|--------------|-------------------|--------|-------------------|
|      |             | Events            | Rate (95% CI)     | Events | Rate (95% CI)     | Events       | Rate (95% CI)     | Events | Rate (95% CI)     |
| 2001 | 3222694     | 411               | 12.8 (11.5, 14.0) | 564    | 17.5 (16.1, 18.9) | 1042         | 32.3 (30.4, 34.3) | 679    | 21.1 (19.5, 22.7) |
| 2002 | 3465374     | 548               | 15.8 (14.5, 17.1) | 590    | 17.0 (15.7, 18.4) | 1130         | 32.6 (30.7, 34.5) | 640    | 18.5 (17.0, 19.9) |
| 2003 | 3865675     | 832               | 21.5 (20.1, 23.0) | 640    | 16.6 (15.3, 17.8) | 1305         | 33.8 (31.9, 35.6) | 633    | 16.4 (15.1, 17.7) |
| 2004 | 4075970     | 542               | 13.3 (12.2, 14.4) | 714    | 17.5 (16.2, 18.8) | 1342         | 32.9 (31.2, 34.7) | 554    | 13.6 (12.5, 14.7) |
| 2005 | 4301541     | 391               | 9.1 (8.2, 10.0)   | 654    | 15.2 (14.0, 16.4) | 1250         | 29.1 (27.4, 30.7) | 609    | 14.2 (13.0, 15.3) |
| 2006 | 4361284     | 365               | 8.4 (7.5, 9.2)    | 603    | 13.8 (12.7, 14.9) | 1243         | 28.5 (26.9, 30.1) | 509    | 11.7 (10.7, 12.7) |
| 2007 | 4365288     | 227               | 5.2 (4.5, 5.9)    | 644    | 14.8 (13.6, 15.9) | 1181         | 27.1 (25.5, 28.6) | 507    | 11.6 (10.6, 12.6) |
| 2008 | 4414083     | 175               | 4.0 (3.4, 4.6)    | 659    | 14.9 (13.8, 16.1) | 1434         | 32.5 (30.8, 34.2) | 403    | 9.1 (8.2, 10.0)   |
| 2009 | 4434175     | 65                | 1.5 (1.1, 1.8)    | 651    | 14.7 (13.6, 15.8) | 1516         | 34.2 (32.5, 35.9) | 636    | 14.3 (13.2, 15.5) |
| 2010 | 4367562     | 47                | 1.1 (0.8, 1.4)    | 608    | 13.9 (12.8, 15.0) | 1464         | 33.5 (31.8, 35.2) | 364    | 8.3 (7.5, 9.2)    |
| 2011 | 4280588     | 54                | 1.3 (0.9, 1.6)    | 533    | 12.5 (11.4, 13.5) | 1672         | 39.1 (37.2, 40.9) | 380    | 8.9 (8.0, 9.8)    |
| 2012 | 4217212     | 36                | 0.9 (0.6, 1.1)    | 538    | 12.8 (11.7, 13.8) | 1672         | 39.6 (37.7, 41.5) | 300    | 7.1 (6.3, 7.9)    |
| 2013 | 3976481     | 40                | 1.0 (0.7, 1.3)    | 503    | 12.6 (11.5, 13.8) | 1520         | 38.2 (36.3, 40.1) | 297    | 7.5 (6.6, 8.3)    |

**Supplementary Table 3: Comparisons of trends in incidence of CFS/ME diagnoses by age, sex and IMD quintile<sup>†</sup>**

|                             |                | Period 1  | Annual Percent Change (95% CI) | Period 2  | Annual Percent Change (95% CI) | Period 3  | Annual Percent Change (95% CI) | Test for parallelism |
|-----------------------------|----------------|-----------|--------------------------------|-----------|--------------------------------|-----------|--------------------------------|----------------------|
| Sex                         | Female         | 2001-2013 | -4.0 (-5.5, -2.4)*             |           |                                |           |                                | Reference            |
|                             | Male           | 2001-2013 | -2.6 (-3.4, -1.7)*             |           |                                |           |                                | P=0.04               |
| Age (years)                 | <20            | 2001-2006 | -4.3 (-7.2, 1-.3)*             | 2006-2011 | 6.4 (2.3, 10.7)*               | 2011-2013 | -6.5 (-17.5, 6.0)              | P=0.001              |
|                             | 20 to 29       | 2001-2013 | -2.9 (-4.9, --0.9)*            |           |                                |           |                                | P=0.10               |
|                             | 30 to 39       | 2001-2013 | -2.1 (-4.1, -0.1)*             |           |                                |           |                                | P=0.04               |
|                             | 40 to 49       | 2001-2013 | -4.2 (-5.5, -2.9)*             |           |                                |           |                                | Reference            |
|                             | 50 to 59       | 2001-2013 | -4.2 (-5.5, -2.9)*             |           |                                |           |                                | P=0.99               |
|                             | 60 to 69       | 2001-2013 | -3.5 (-6.3, -0.6)*             |           |                                |           |                                | P=0.60               |
|                             | 70+            | 2001-2013 | -4.6 (-8.8, -0.2)*             |           |                                |           |                                | P=0.82               |
| Practice-level IMD quintile | Least deprived | 2001-2013 | -3.9 (-5.3, -2.5)*             |           |                                |           |                                | P=0.37               |
|                             | Quintile 2     | 2001-2013 | -3.2 (-5.5, -0.8)*             |           |                                |           |                                | P=0.72               |
|                             | Quintile 3     | 2001-2013 | -2.9 (-4.9, -0.8)*             |           |                                |           |                                | Reference            |
|                             | Quintile 4     | 2001-2013 | -2.0 (-4.0, -0.1)*             |           |                                |           |                                | P=0.54               |
|                             | Most deprived  | 2001-2013 | -2.0 (-3.2, -0.9)*             |           |                                |           |                                | P=0.40               |

<sup>†</sup> Trends shown are best fit to data for individual levels of each categorical variable. Test for parallelism P-value indicates strength of evidence for departure from parallel trend with reference level of categorical variable

\* Evidence that Annual Percentage Change is greater than or less than zero at  $\alpha=0.05$ .

**Supplementary Table 4: Comparisons of trends in incidence of FM diagnoses by age, sex and IMD quintile<sup>†</sup>**

|                             |                | Period 1  | Annual Percent Change (95% CI) | Period 2  | Annual Percent Change (95% CI) | Period 3  | Annual Percent Change (95% CI) | Test for parallelism |
|-----------------------------|----------------|-----------|--------------------------------|-----------|--------------------------------|-----------|--------------------------------|----------------------|
| Sex                         | Female         | 2001-2007 | -1.7 (-4.8, 1.4)               | 2007-2013 | 6.4 (3.6, 9.4)*                |           |                                | Reference            |
|                             | Male           | 2001-2013 | -2.3 (-4.0, -0.5)*             |           |                                |           |                                | P=0.002              |
| Age (years)                 | <20            | 2001-2013 | 3.5 (-1.0, 8.1)                |           |                                |           |                                | P=0.81               |
|                             | 20 to 29       | 2001-2013 | 5.0 (2.3, 7.7)*                |           |                                |           |                                | P=0.52               |
|                             | 30 to 39       | 2001-2006 | -4.4 (-9.4, 0.9)               | 2006-2011 | 10.1 (2.5, 18.3)*              | 2011-2013 | -7.0 (-25.4, 15.7)             | P=0.03               |
|                             | 40 to 49       | 2001-2007 | -2.2 (-5.8, 1.6)               | 2007-2013 | 8.8 (5.5, 12.2)*               |           |                                | Reference            |
|                             | 50 to 59       | 2001-2007 | -2.2 (-5.4, 1.0)               | 2007-2013 | 6.0 (3.0, 9.1)*                |           |                                | P=0.01               |
|                             | 60 to 69       | 2001-2013 | -1.5 (-3.2, 0.3)               |           |                                |           |                                | P<0.001              |
|                             | 70+            | 2001-2013 | -3.4 (-5.5, -1.1)*             |           |                                |           |                                | P<0.001              |
| Practice-level IMD quintile | Least deprived | 2001-2007 | -4.7 (-7.9, -1.4)*             | 2007-2011 | 8.6 (-1.1, 19.2)               | 2011-2013 | -8.3 (-24.0, 10.6)             | P=0.13               |
|                             | Quintile 2     | 2001-2007 | -3.7 (-7.2, -0.2)*             | 2007-2010 | 10.9 (-8.0, 33.7)              | 2010-2013 | 0.6 (-7.8, 9.8)                | P=0.63               |
|                             | Quintile 3     | 2001-2013 | 3.0 (0.6, 5.5)*                |           |                                |           |                                | Reference            |
|                             | Quintile 4     | 2001-2006 | -6.7 (-11.3, -1.9)*            | 2006-2013 | 1.1 (-2.0, 4.4)                |           |                                | P=0.002              |
|                             | Most deprived  | 2001-2013 | 1.4 (-0.5, 3.3)                |           |                                |           |                                | P=0.64               |

<sup>†</sup> Trends shown are best fit to data for individual levels of each categorical variable. Test for parallelism P-value indicates strength of evidence for departure from parallel trend with reference level of categorical variable

\* Evidence that Annual Percentage Change is greater than or less than zero at  $\alpha=0.05$
